# Supplementary material for: Influence of the Canopy Drip Effect on the Accumulation of Atmospheric Metal and Nitrogen Deposition in Mosses
Source: MDPI journal article supplement (doi:10.3390/f13040605), 2022-04-12
Supplement: s1 [file s1]

## Supplementary Materials

**Table S1.** Metal and nitrogen concentrations in the moss samples of the Lower Saxony supplementary network to MM2020.

| Location Category | Location  | Moss Species  | Aluminium (Al) mg/kg | Arsenic (As) mg/kg | Cadmium (Cd) mg/kg | Chromium (Cr) mg/kg | Copper (Cu) mg/kg | Iron (Fe) mg/kg | Nickel (Ni) mg/kg | Lead (Pb) mg/kg | Antimony (Sb) mg/kg | Vanadium (V) mg/kg | Zinc (Zn) mg/kg | Mercury (Hg) mg/kg | Nitrogen (N) Ma% |
|-------------------|-----------|---------------|----------------------|--------------------|--------------------|---------------------|-------------------|-----------------|-------------------|-----------------|---------------------|--------------------|-----------------|--------------------|------------------|
| F                 | NI03_92   | <i>Plesch</i> | 74                   | 0.03               | 0.18               | 0.68                | 4.38              | 124             | 0.47              | 1.15            | 0.13                | 0.66               | 39.7            | 0.034              | 1.82             |
| T                 | NI03_94   | <i>Plesch</i> | 228                  | 0.05               | 0.16               | 1.24                | 7.13              | 324             | 1.52              | 1.85            | 0.17                | 1.10               | 33.7            | 0.058              | 2.24             |
| T                 | NI03_95   | <i>Plesch</i> | 146                  | 0.08               | 0.19               | 0.82                | 7.44              | 198             | 0.97              | 1.19            | 0.15                | 0.71               | 37.1            | 0.044              | 2.22             |
| F                 | NI104_88  | <i>Psepur</i> | 110                  | 0.05               | 0.13               | 0.79                | 5.08              | 177             | 0.64              | 0.94            | 0.12                | 0.60               | 36.2            | 0.021              | 1.33             |
| T                 | NI104_90  | <i>Psepur</i> | 159                  | 0.05               | 0.11               | 1.00                | 7.13              | 262             | 1.28              | 1.18            | 0.13                | 0.81               | 54.5            | 0.050              | 1.92             |
| T                 | NI104_91  | <i>Psepur</i> | 171                  | 0.06               | 0.10               | 1.29                | 4.88              | 310             | 1.50              | 1.06            | 0.13                | 0.80               | 43.3            | 0.034              | 1.60             |
| F                 | NI108_100 | <i>Psepur</i> | 268                  | 0.11               | 0.22               | 1.25                | 11.66             | 244             | 1.53              | 1.94            | 0.17                | 0.78               | 53.7            | <u>0.122</u>       | 3.11             |
| T                 | NI108_101 | <i>Psepur</i> | 123                  | 0.04               | 0.13               | 0.83                | 7.62              | 151             | 0.78              | 1.66            | 0.12                | 0.54               | 32.2            | 0.056              | 2.22             |
| T                 | NI108_102 | <i>Psepur</i> | 95                   | 0.01               | 0.12               | 0.65                | 6.22              | 105             | 0.77              | 0.70            | 0.11                | 0.33               | 35.8            | 0.036              | 1.98             |
| T                 | NI108_98  | <i>Psepur</i> | 97                   | 0.03               | 0.14               | 0.78                | 4.27              | 88              | 0.78              | 0.61            | 0.12                | 0.26               | 36.7            | 0.048              | 1.42             |
| F                 | NI116_120 | <i>Plesch</i> | 169                  | 0.06               | 0.07               | 0.97                | <u>7.57</u>       | 210             | 1.34              | 1.17            | <u>0.17</u>         | 0.55               | 31.2            | 0.049              | 1.85             |

|   |               |               |             |             |             |              |              |             |             |             |             |             |             |              |      |
|---|---------------|---------------|-------------|-------------|-------------|--------------|--------------|-------------|-------------|-------------|-------------|-------------|-------------|--------------|------|
| T | NI116_12<br>2 | <i>Plesch</i> | 116         | 0.06        | 0.25        | 0.76         | 11.12        | 137         | 0.69        | 0.87        | 0.12        | 0.35        | <u>62.2</u> | 0.049        | 3.15 |
| T | NI116_12<br>3 | <i>Plesch</i> | 348         | <u>0.13</u> | 0.17        | 1.98         | 7.97         | 359         | 2.10        | <u>3.02</u> | 0.13        | 1.12        | 37.0        | 0.080        | 2.16 |
| F | NI117_12<br>3 | <i>Psepur</i> | <u>3057</u> | <u>0.72</u> | <u>0.30</u> | <u>15.68</u> | 5.36         | <u>2327</u> | <u>7.84</u> | <u>3.13</u> | 0.11        | <u>6.12</u> | 37.8        | 0.032        | 1.16 |
| T | NI117_12<br>4 | <i>Psepur</i> | 194         | 0.11        | 0.22        | 1.32         | <u>14.50</u> | 282         | 1.29        | 1.77        | 0.16        | 1.02        | <u>80.4</u> | <u>0.120</u> | 3.29 |
| T | NI117_12<br>5 | <i>Psepur</i> | 153         | 0.05        | 0.15        | 0.95         | 11.04        | 214         | 1.39        | 1.28        | 0.13        | 0.61        | 45.6        | 0.057        | 2.89 |
| F | NI118_12<br>5 | <i>Psepur</i> | 631         | 0.19        | 0.08        | <u>12.04</u> | 3.48         | 536         | <u>8.26</u> | 1.38        | 0.11        | 1.12        | 24.5        | 0.024        | 1.09 |
| T | NI118_12<br>7 | <i>Psepur</i> | 133         | 0.03        | 0.18        | 0.75         | 6.42         | 130         | 0.91        | 0.76        | 0.11        | 0.33        | 41.8        | 0.033        | 1.74 |
| T | NI118_12<br>8 | <i>Psepur</i> | 244         | 0.06        | 0.11        | 1.28         | 5.87         | 259         | 1.26        | 1.37        | 0.13        | 0.67        | 45.6        | 0.051        | 1.46 |
| F | NI124_13<br>9 | <i>Plesch</i> | 306         | 0.12        | 0.13        | 1.63         | 4.55         | 343         | 1.86        | 2.02        | <u>0.21</u> | 1.42        | 26.4        | <u>0.170</u> | 1.33 |
| T | NI124_14<br>3 | <i>Plesch</i> | 256         | 0.07        | 0.10        | 1.58         | 7.23         | 266         | 2.01        | 1.11        | 0.13        | 0.97        | 39.6        | 0.070        | 1.92 |
| F | NI130_15<br>7 | <i>Plesch</i> | 139         | 0.05        | 0.07        | 0.80         | 5.87         | 91          | 0.83        | 0.75        | 0.11        | 0.32        | 33.4        | 0.031        | 1.56 |

|   |               |               |     |             |      |             |      |     |      |      |      |             |      |       |      |
|---|---------------|---------------|-----|-------------|------|-------------|------|-----|------|------|------|-------------|------|-------|------|
| T | NI130_16<br>0 | <i>Plesch</i> | 132 | 0.08        | 0.11 | 0.71        | 6.62 | 141 | 0.71 | 0.66 | 0.11 | 0.77        | 27.1 | 0.035 | 1.57 |
| T | NI130_16<br>1 | <i>Plesch</i> | 131 | 0.09        | 0.12 | 1.91        | 7.72 | 168 | 1.58 | 0.77 | 0.14 | 0.76        | 40.0 | 0.045 | 1.69 |
| T | NI130_16<br>2 | <i>Plesch</i> | 296 | <u>0.16</u> | 0.18 | <u>2.13</u> | 9.60 | 457 | 1.84 | 1.64 | 0.16 | <u>2.57</u> | 40.8 | 0.079 | 2.50 |
| F | NI130_16<br>3 | <i>Plesch</i> | 109 | 0.07        | 0.08 | 0.96        | 5.56 | 175 | 1.01 | 0.60 | 0.10 | 0.93        | 24.9 | 0.029 | 1.41 |

F = open space site; T = canopy drip site; Plesch = *Pleurozium schreberi*; Psepur = *Pseudoscleropodium purum*; underlined = outlier values; MA% = mass%.

**Table S2.** Descriptive-statistical characteristics of quantified metal and nitrogen concentrations in the moss samples from 25 sites in the Lower Saxony supplementary network to MM2020.

| Element | Location Category | n  | Min [µg/g] | P20 [µg/g] | P50 [µg/g] | P90 [µg/g] | P98 [µg/g] | Max [µg/g] | MW [µg/g] | SD [µg/g] | CV [%]  |
|---------|-------------------|----|------------|------------|------------|------------|------------|------------|-----------|-----------|---------|
| Al      | F                 | 9  | 74         | 104        | 139        | 1116       | 2669       | 3057       | 521       | 967       | 185     |
|         | T                 | 17 | 95         | 132        | 159        | 279        | 331        | 348        | 188       | 73        | 39      |
|         | Total             | 26 | 74         | 116        | 156        | 327        | 1844       | 3057       | 303       | 573       | 189     |
| As      | F                 | 9  | 0.02       | 0.03       | 0.05       | 0.29       | 0.63       | 0.71       | 0.14      | 0.22      | 159.19  |
|         | T                 | 17 | 0.01       | 0.04       | 0.06       | 0.12       | 0.15       | 0.16       | 0.07      | 0.04      | 56.10   |
|         | Total             | 26 | 0.01       | 0.04       | 0.06       | 0.15       | 0.45       | 0.71       | 0.09      | 0.13      | 143.76  |
| Cd      | F                 | 9  | 0.07       | 0.07       | 0.12       | 0.2        | 0.27       | 0.29       | 0.13      | 0.07      | 57.31   |
|         | T                 | 17 | 0.09       | 0.11       | 0.14       | 0.21       | 0.23       | 0.24       | 0.15      | 0.05      | 31.08   |
|         | Total             | 26 | 0.07       | 0.10       | 0.12       | 0.22       | 0.26       | 0.29       | 0.14      | 0.06      | 39.89   |
| Cr      | F                 | 9  | 0.67       | 0.79       | 0.95       | 12.76      | 15.09      | 15.67      | 3.81      | 5.77      | 151.53  |
|         | T                 | 17 | 0.65       | 0.76       | 1.24       | 1.93       | 2.08       | 2.13       | 1.20      | 0.47      | 39.01   |
|         | Total             | 26 | 0.65       | 0.78       | 0.98       | 2.05       | 13.85      | 15.67      | 2.10      | 3.52      | 167.56  |
| Cu      | F                 | 9  | 3.47       | 4.33       | 5.08       | 6.20       | 7.29       | 7.56       | 5.12      | 1.18      | 23.01   |
|         | T                 | 17 | 4.88       | 6.46       | 7.43       | 11.33      | 13.59      | 14.50      | 8.24      | 2.51      | 30.43   |
|         | Total             | 26 | 3.47       | 5.08       | 6.87       | 11.07      | 13.08      | 14.5       | 7.16      | 2.60      | 36.33   |
| Fe      | F                 | 9  | 88         | 111        | 177        | 894        | 2040       | 2327       | 452       | 717       | 159     |
|         | T                 | 17 | 105        | 143        | 244        | 338        | 426        | 457        | 236       | 94        | 40      |
|         | Total             | 26 | 88         | 137        | 212        | 408        | 1431       | 2327       | 311       | 426       | 137     |
| Hg      | F                 | 9  | 0.020      | 0.020      | 0.030      | 0.064      | 0.141      | 0.160      | 0.043     | 0.044     | 102.556 |
|         | T                 | 17 | 0.030      | 0.032      | 0.050      | 0.090      | 0.120      | 0.120      | 0.055     | 0.028     | 51.345  |
|         | Total             | 26 | 0.020      | 0.030      | 0.040      | 0.095      | 0.140      | 0.160      | 0.051     | 0.034     | 67.299  |
| Ni      | F                 | 9  | 0.47       | 0.72       | 1.01       | 7.91       | 8.18       | 8.25       | 2.55      | 3.14      | 122.87  |
|         | T                 | 17 | 0.69       | 0.80       | 1.29       | 1.90       | 2.06       | 2.09       | 1.29      | 0.45      | 34.38   |
|         | Total             | 26 | 0.47       | 0.78       | 1.28       | 2.04       | 8.04       | 8.25       | 1.73      | 1.91      | 110.42  |
| Pb      | F                 | 9  | 0.60       | 0.69       | 1.15       | 2.23       | 2.94       | 3.12       | 1.3       | 0.81      | 62.33   |
|         | T                 | 17 | 0.66       | 0.79       | 1.19       | 1.89       | 2.67       | 3.01       | 1.34      | 0.60      | 44.77   |
|         | Total             | 26 | 0.60       | 0.75       | 1.17       | 1.97       | 3.06       | 3.12       | 1.33      | 0.66      | 50.07   |
| Sb      | F                 | 9  | 0.10       | 0.10       | 0.11       | 0.17       | 0.19       | 0.20       | 0.12      | 0.03      | 27.28   |
|         | T                 | 17 | 0.10       | 0.12       | 0.13       | 0.16       | 0.16       | 0.16       | 0.13      | 0.02      | 13.93   |
|         | Total             | 26 | 0.10       | 0.11       | 0.12       | 0.16       | 0.18       | 0.20       | 0.13      | 0.02      | 18.90   |
| V       | F                 | 9  | 0.26       | 0.46       | 0.66       | 2.36       | 5.36       | 6.11       | 1.33      | 1.83      | 137.79  |
|         | T                 | 17 | 0.32       | 0.55       | 0.76       | 1.10       | 2.11       | 2.57       | 0.83      | 0.51      | 61.18   |

|    |       |    |              |              |              |              |              |              |             |             |           |
|----|-------|----|--------------|--------------|--------------|--------------|--------------|--------------|-------------|-------------|-----------|
|    | Total | 26 | 0.26         | 0.54         | 0.76         | 1.27         | 4.34         | 6.11         | 1.01        | 1.14        | 113.29    |
| Zn | F     | 9  | 24.52        | 25.82        | 33.36        | 38.21        | 39.43        | 39.73        | 32.32       | 5.84        | 18.05     |
|    | T     | 17 | 27.10        | 36.02        | 40.8         | 57.59        | 74.54        | 80.35        | 44.14       | 12.77       | 28.93     |
|    | Total | 26 | 24.52        | 32.17        | 37.44        | 54.08        | 71.28        | 80.35        | 40.05       | 12.17       | 30.38     |
|    |       |    | Min<br>[Ma%] | P20<br>[Ma%] | P50<br>[Ma%] | P90<br>[Ma%] | P98<br>[Ma%] | Max<br>[Ma%] | MW<br>[Ma%] | SD<br>[Ma%] | CV<br>[%] |
| N  | F     | 9  | 1.09         | 1.26         | 1.41         | 1.83         | 1.85         | 1.85         | 1.44        | 0.26        | 18.25     |
|    | T     | 17 | 1.46         | 1.7          | 2.16         | 3.13         | 3.25         | 3.29         | 2.22        | 0.58        | 26.38     |
|    | Total | 26 | 1.09         | 1.42         | 1.83         | 3.00         | 3.22         | 3.29         | 1.95        | 0.62        | 31.73     |

F = open land area; T = canopy drips area; n = sample size; P20 = 20th percentile; P50 = 50th percentile; P90 = 90th percentile; P98 = 98th percentile; MW = arithmetic mean; SD = standard deviation; CV = relative coefficient of variation; Ma% = mass%.

**Table S3.** Element- and site-specific comparison of the median values of neighbouring open land and canopy drips sites in the Lower Saxony supplementary network to MM2020.

| Element | Location<br>Combination | n  | Median (T) | Median (F) | Ratio (T/F) |
|---------|-------------------------|----|------------|------------|-------------|
| Al      | TF                      | 20 | 156 µg/g   | 124 µg/g   | 1.26        |
| As      | TF                      | 20 | 0.06 µg/g  | 0.04 µg/g  | 1.44        |
| Cd      | TF                      | 20 | 0.14 µg/g  | 0.10 µg/g  | 1.35 *      |
| Cr      | TF                      | 20 | 1.25 µg/g  | 0.88 µg/g  | 1.42        |
| Cu      | TF                      | 20 | 7.53 µg/g  | 5.22 µg/g  | 1.44 ***    |
| Fe      | TF                      | 20 | 229 µg/g   | 175 µg/g   | 1.31        |
| Hg      | TF                      | 20 | 0.045 µg/g | 0.030 µg/g | 1.50 ***    |
| Ni      | TF                      | 20 | 1.33 µg/g  | 0.92 µg/g  | 1.46        |
| Pb      | TF                      | 20 | 1.18 µg/g  | 0.94 µg/g  | 1.26        |
| Sb      | TF                      | 20 | 0.13 µg/g  | 0.11 µg/g  | 1.18 *      |
| V       | TF                      | 20 | 0.76 µg/g  | 0.63 µg/g  | 1.21        |
| Zn      | TF                      | 20 | 40.41 µg/g | 33.36 µg/g | 1.21 ***    |
| N       | TF                      | 20 | 2.07 Ma%   | 1.42 Ma%   | 1.46 ***    |

T = canopy drip site, F = open land site; n = sample size; Ma% = mass%; \*\*\* =  $p \leq 0.01$  (very significant); \*\* =  $p \leq 0.05$  (significant); \* =  $p \leq 0.1$  (weakly significant)

**Table S4.** Element- and site-specific comparison of the median values of neighbouring open land and canopy drip sites (without outliers) in the Lower Saxony supplementary network to MM2020.

| Element | Location<br>Combination | n  | Median (T) | Median (F) | Ratio (T/F) |
|---------|-------------------------|----|------------|------------|-------------|
| Al      | TF                      | 20 | 156 µg/g   | 109 µg/g   | 1.43 **     |
| As      | TF                      | 17 | 0.06 µg/g  | 0.04 µg/g  | 1.50        |
| Cd      | TF                      | 20 | 0.14 µg/g  | 0.08 µg/g  | 1.69 ***    |
| Cr      | TF                      | 18 | 1.12 µg/g  | 0.80 µg/g  | 1.40 *      |
| Cu      | TF                      | 19 | 7.43 µg/g  | 5.08 µg/g  | 1.46 ***    |
| Fe      | TF                      | 20 | 229 µg/g   | 175 µg/g   | 1.31        |
| Hg      | TF                      | 18 | 0.04 µg/g  | 0.03 µg/g  | 1.33 ***    |
| Ni      | TF                      | 20 | 1.33 µg/g  | 0.82 µg/g  | 1.63 ***    |
| Pb      | TF                      | 19 | 1.17 µg/g  | 0.84 µg/g  | 1.38        |
| Sb      | TF                      | 20 | 0.13 µg/g  | 0.11 µg/g  | 1.18 ***    |
| V       | TF                      | 18 | 0.76 µg/g  | 0.60 µg/g  | 1.26        |
| Zn      | TF                      | 18 | 40.41 µg/g | 33.36 µg/g | 1.20 ***    |

|   |    |    |          |          |          |
|---|----|----|----------|----------|----------|
| N | TF | 20 | 2.07 Ma% | 1.42 Ma% | 1.46 *** |
|---|----|----|----------|----------|----------|

T = canopy drip site, F = open land site; n = sample size; Ma% = mass%; \*\*\* =  $p \leq 0.01$  (very significant); \*\* =  $p \leq 0.05$  (significant); \* =  $p \leq 0.1$  (weakly significant)

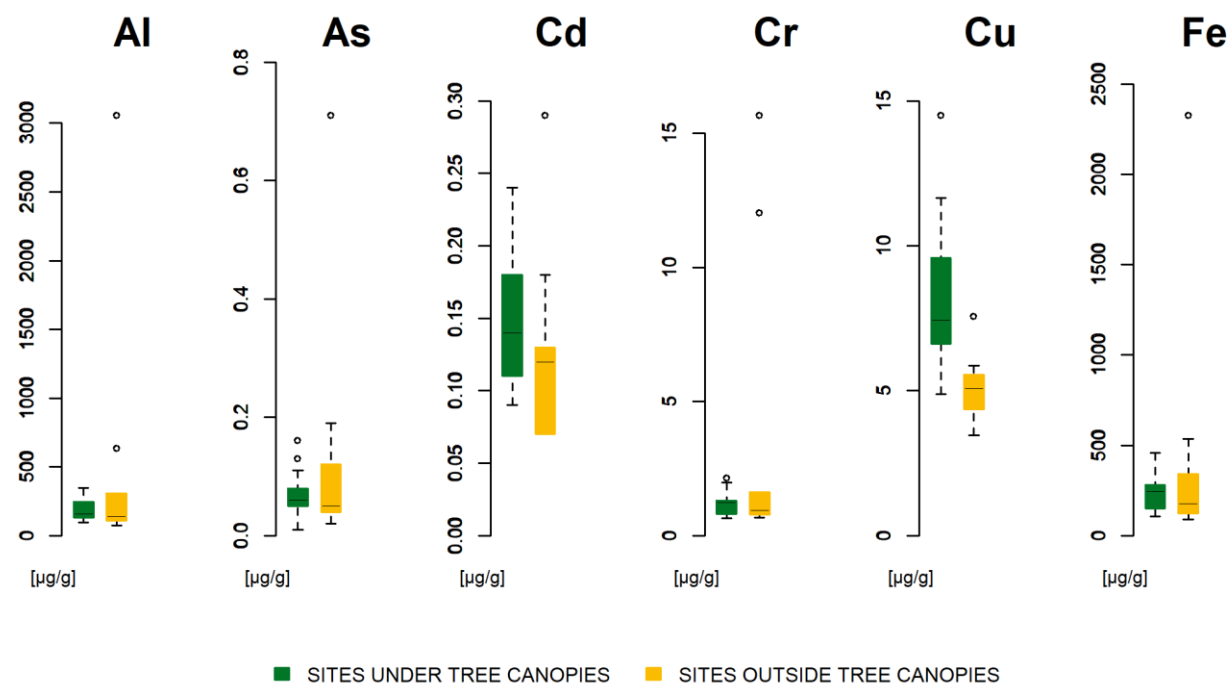

**Figure S1.** Distributions of the concentrations of Al, As, Cd, Cr, Cu and Fe in the moss samples of the Lower Saxony supplementary network to MM2020.

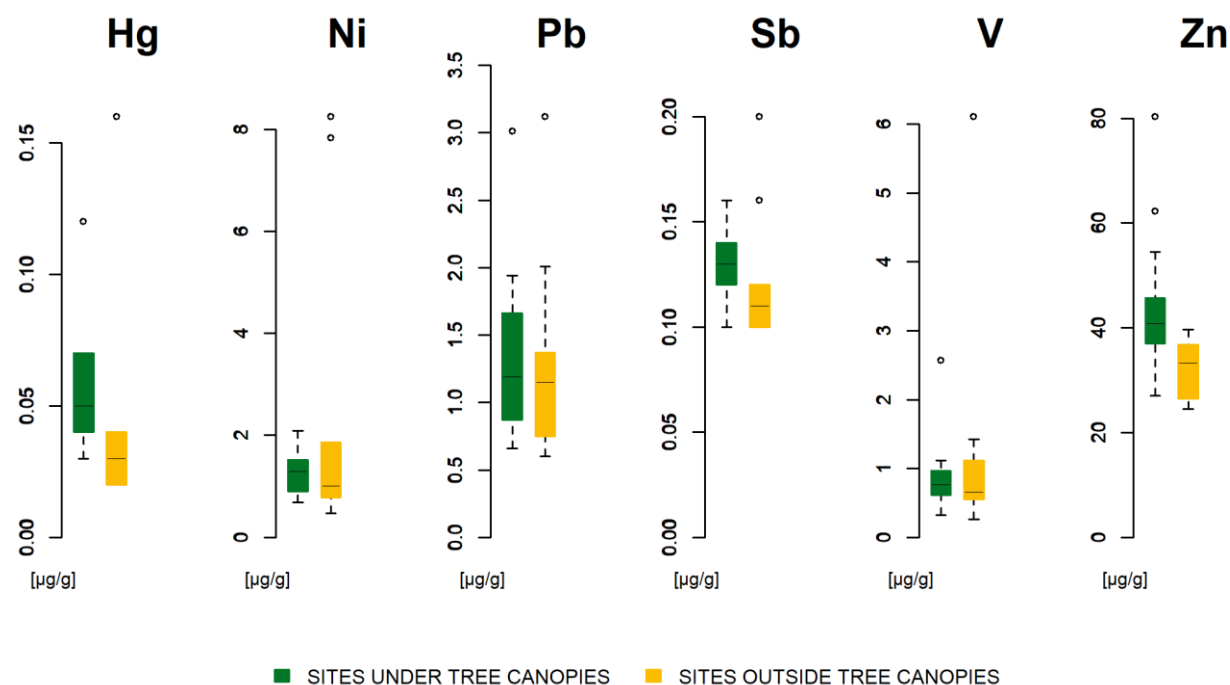

**Figure S2.** Distributions of the concentrations of Hg, Ni, Pb, Sb, V and Zn in the moss samples of the Lower Saxony supplementary network to MM2020.

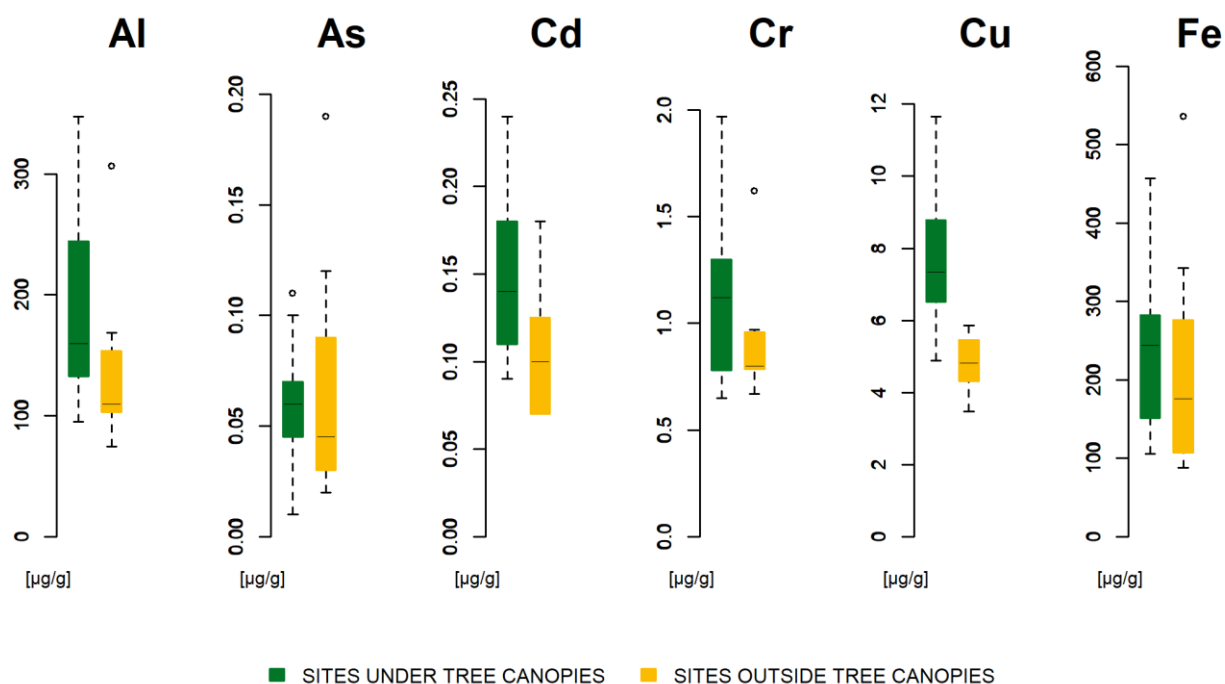

**Figure S3.** Distributions of the concentrations of Al, As, Cd, Cr, Cu and Fe in the moss samples of the Lower Saxony supplementary network to MM2020 (without outlier values).

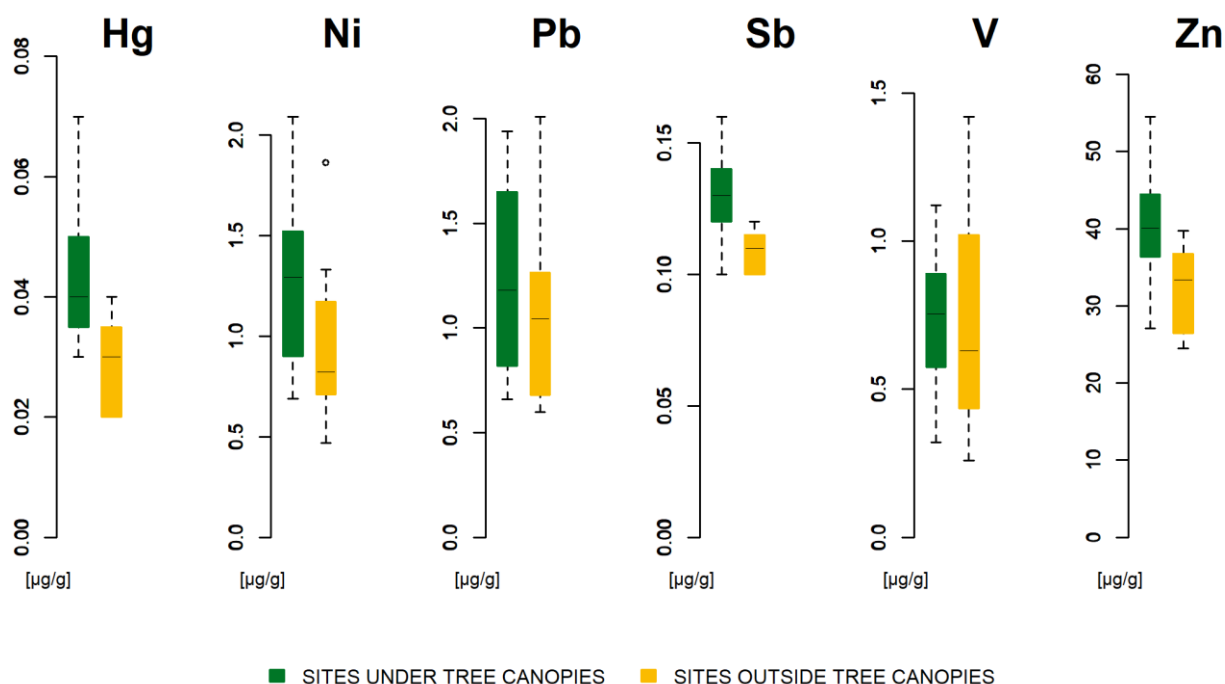

**Figure S4.** Distributions of the concentrations of Hg, Ni, Pb, Sb, V and Zn in the moss samples of the Lower Saxony supplementary network to MM2020 (without outlier values).



**Table S5.** Correlation coefficients (Pearson, Spearman) for the relationship between the quotients of the element contents in the mosses and the quotients of the examined vegetation structure measures (only significant correlations  $\geq 0.4$  are shown).

| Element | Vegetation Structure Measure | n  | Rp   |     | rplog |     | rs   |     |
|---------|------------------------------|----|------|-----|-------|-----|------|-----|
| Al      | sLAI.lu                      | 32 | 0.65 | *** | 0.65  | *** | 0.70 | *** |
|         | wLAI.lu                      | 32 | 0.67 | *** | 0.66  | *** | 0.69 | *** |
|         | sLAI.veg                     | 32 | 0.64 | *** | 0.63  | *** | 0.63 | *** |
|         | wLAI.veg                     | 32 | 0.69 | *** | 0.67  | *** | 0.67 | *** |
|         | sLAI.spec                    | 32 | 0.84 | *** | 0.80  | *** | 0.76 | *** |
|         | wLAI.spec                    | 32 | 0.85 | *** | 0.81  | *** | 0.77 | *** |
| Cd      | sLAI.lu                      | 36 | 0.45 | *** | 0.48  | *** | 0.45 | *** |
|         | wLAI.lu                      | 36 | 0.59 | *** | 0.61  | *** | 0.63 | *** |
|         | sLAI.veg                     | 36 | 0.60 | *** | 0.62  | *** | 0.63 | *** |
|         | wLAI.veg                     | 36 | 0.55 | *** | 0.58  | *** | 0.60 | *** |
|         | sLAI.spec                    | 36 | 0.48 | *** | 0.52  | *** | 0.67 | *** |
|         | wLAI.spec                    | 36 | 0.51 | *** | 0.54  | *** | 0.66 | *** |
| Cr      | sLAI.lu                      | 28 | 0.46 | *** | 0.48  | *** | 0.47 | *** |
|         | wLAI.lu                      | 28 | 0.46 | *** | 0.49  | *** | 0.39 | **  |
|         | sLAI.spec                    | 28 | 0.57 | *** | 0.58  | *** | 0.60 | *** |
|         | wLAI.spec                    | 28 | 0.47 | *** | 0.48  | *** | 0.47 | *** |
| Cu      | sLAI.lu                      | 34 | 0.52 | *** | 0.59  | *** | 0.66 | *** |
|         | wLAI.lu                      | 34 | 0.85 | *** | 0.86  | *** | 0.85 | *** |
|         | sLAI.veg                     | 34 | 0.81 | *** | 0.84  | *** | 0.82 | *** |
|         | wLAI.veg                     | 34 | 0.80 | *** | 0.83  | *** | 0.81 | *** |
|         | sLAI.spec                    | 34 | 0.90 | *** | 0.90  | *** | 0.92 | *** |
|         | wLAI.spec                    | 34 | 0.88 | *** | 0.87  | *** | 0.90 | *** |
| Fe      | sLAI.lu                      | 36 | 0.21 |     | 0.26  |     | 0.41 | *** |
|         | wLAI.lu                      | 36 | 0.40 | **  | 0.36  | **  | 0.49 | *** |
|         | sLAI.veg                     | 36 | 0.38 | **  | 0.34  | **  | 0.43 | *** |
|         | wLAI.veg                     | 36 | 0.40 | *** | 0.36  | **  | 0.46 | *** |
|         | sLAI.spec                    | 36 | 0.52 | *** | 0.48  | *** | 0.50 | *** |
|         | wLAI.spec                    | 36 | 0.52 | *** | 0.48  | *** | 0.53 | *** |
| Hg      | sLAI.lu                      | 34 | 0.57 | *** | 0.60  | *** | 0.66 | *** |
|         | wLAI.lu                      | 34 | 0.62 | *** | 0.67  | *** | 0.61 | *** |
|         | sLAI.veg                     | 34 | 0.59 | *** | 0.64  | *** | 0.61 | *** |
|         | wLAI.veg                     | 34 | 0.60 | *** | 0.65  | *** | 0.62 | *** |
|         | sLAI.spec                    | 34 | 0.66 | *** | 0.69  | *** | 0.78 | *** |

|    |           |    |      |     |      |     |      |     |
|----|-----------|----|------|-----|------|-----|------|-----|
|    | wLAI.spec | 34 | 0.64 | *** | 0.66 | *** | 0.76 | *** |
| Ni | sLAI.lu   | 32 | 0.53 | *** | 0.52 | *** | 0.55 | *** |
|    | wLAI.lu   | 32 | 0.56 | *** | 0.57 | *** | 0.54 | *** |
|    | sLAI.veg  | 32 | 0.54 | *** | 0.53 | *** | 0.54 | *** |
|    | wLAI.veg  | 32 | 0.58 | *** | 0.59 | *** | 0.59 | *** |
|    | sLAI.spec | 32 | 0.75 | *** | 0.73 | *** | 0.71 | *** |
|    | wLAI.spec | 32 | 0.69 | *** | 0.67 | *** | 0.65 | *** |
| Pb | sLAI.lu   | 34 | 0.31 | *   | 0.36 | **  | 0.46 | *** |
|    | wLAI.lu   | 34 | 0.47 | *** | 0.45 | *** | 0.48 | *** |
|    | sLAI.veg  | 34 | 0.40 | **  | 0.40 | **  | 0.40 | **  |
|    | wLAI.veg  | 34 | 0.42 | *** | 0.42 | *** | 0.42 | *** |
|    | sLAI.spec | 34 | 0.61 | *** | 0.58 | *** | 0.52 | *** |
|    | wLAI.spec | 34 | 0.64 | *** | 0.61 | *** | 0.56 | *** |
| Sb | sLAI.lu   | 34 | 0.60 | *** | 0.65 | *** | 0.66 | *** |
|    | wLAI.lu   | 34 | 0.75 | *** | 0.77 | *** | 0.69 | *** |
|    | sLAI.veg  | 34 | 0.74 | *** | 0.77 | *** | 0.73 | *** |
|    | wLAI.veg  | 34 | 0.74 | *** | 0.77 | *** | 0.73 | *** |
|    | sLAI.spec | 34 | 0.80 | *** | 0.82 | *** | 0.84 | *** |
|    | wLAI.spec | 34 | 0.78 | *** | 0.80 | *** | 0.84 | *** |
| V  | sLAI.spec | 32 | 0.41 | **  | 0.38 | **  | 0.36 | **  |
|    | wLAI.spec | 32 | 0.42 | **  | 0.39 | **  | 0.40 | **  |
| Zn | sLAI.lu   | 36 | 0.34 | **  | 0.40 | **  | 0.44 | *** |
|    | wLAI.lu   | 36 | 0.46 | *** | 0.52 | *** | 0.38 | **  |
|    | sLAI.veg  | 36 | 0.47 | *** | 0.52 | *** | 0.45 | *** |
|    | wLAI.veg  | 36 | 0.46 | *** | 0.51 | *** | 0.44 | *** |
|    | sLAI.spec | 36 | 0.46 | *** | 0.50 | *** | 0.59 | *** |
|    | wLAI.spec | 36 | 0.40 | **  | 0.42 | *** | 0.50 | *** |
| N  | sLAI.lu   | 40 | 0.42 | *** | 0.51 | *** | 0.66 | *** |
|    | wLAI.lu   | 40 | 0.74 | *** | 0.75 | *** | 0.79 | *** |
|    | sLAI.veg  | 40 | 0.73 | *** | 0.75 | *** | 0.82 | *** |
|    | wLAI.veg  | 40 | 0.73 | *** | 0.75 | *** | 0.81 | *** |
|    | sLAI.spec | 40 | 0.87 | *** | 0.84 | *** | 0.87 | *** |
|    | wLAI.spec | 40 | 0.86 | *** | 0.83 | *** | 0.86 | *** |

sLAI.lu = land-use specific simple leaf area index; wLAI.lu = land-use specific and cover weighted leaf area index; sLAI.veg = vegetation specific simple leaf area index; wLAI.veg = vegetation specific and cover weighted leaf area index; sLAI.spec = tree species specific simple leaf area index; wLAI.spec = tree species-specific and cover-weighted leaf area index; n = sample size; rp = correlation coefficient (Pearson); rlogp = correlation coefficient (Pearson) calculated with log-transformed vegetation parameters; rs = correlation coefficient (Spearman); \*\*\* =  $p \leq 0.01$  (very significant); \*\* =  $p \leq 0.05$  (significant); \* =  $p \leq 0.1$  (weakly significant); bold = vegetation structure measure with the comparatively highest correlation coefficients.

**Table S6.** Characteristics and goodness-of-fit measures of the regression models for the relationship between the quotients of the element contents in mosses and the quotients of the simple tree species-specific leaf area index.

| Element | n  | Vegetation Structure Measure | a      | b       | RSE  | R <sup>2</sup> | Adj. R <sup>2</sup> | Pseudo R <sup>2</sup> |
|---------|----|------------------------------|--------|---------|------|----------------|---------------------|-----------------------|
| Al      | 32 | sLAI.spec ***                | 1.2432 | -0.1776 | 0.39 | 0.71           | 0.70                | 0.69                  |
| As_     | 30 | sLAI.spec *                  | 0.9851 | 0.4071  | 1.42 | 0.10           | 0.07                | 0.10                  |
| Cd      | 36 | sLAI.spec ***                | 0.6895 | 0.4138  | 0.62 | 0.23           | 0.21                | 0.31                  |
| Cr      | 28 | sLAI.spec ***                | 0.6111 | 0.4423  | 0.43 | 0.32           | 0.29                | 0.47                  |
| Cu      | 34 | sLAI.spec ***                | 0.9164 | 0.1012  | 0.25 | 0.82           | 0.81                | 0.88                  |
| Fe      | 36 | sLAI.spec ***                | 1.1376 | 0.0737  | 0.92 | 0.27           | 0.24                | 0.36                  |
| Hg      | 34 | sLAI.spec ***                | 0.9259 | 0.1594  | 0.54 | 0.43           | 0.41                | 0.59                  |
| Ni      | 32 | sLAI.spec ***                | 1.1084 | -0.0177 | 0.48 | 0.57           | 0.55                | 0.60                  |
| Pb      | 34 | sLAI.spec ***                | 0.8505 | 0.2287  | 0.55 | 0.37           | 0.35                | 0.44                  |
| Sb      | 34 | sLAI.spec ***                | 0.3245 | 0.6565  | 0.15 | 0.64           | 0.63                | 0.70                  |
| V       | 32 | sLAI.spec **                 | 0.6692 | 0.4851  | 0.72 | 0.16           | 0.14                | 0.16                  |
| Zn      | 36 | sLAI.spec ***                | 0.2910 | 0.7279  | 0.31 | 0.21           | 0.19                | 0.31                  |
| N       | 40 | sLAI.spec ***                | 0.8532 | 0.1572  | 0.28 | 0.75           | 0.75                | 0.75                  |

sLAI.spec = tree species-specific simple leaf area index; n = sample size; a = slope of the regression line; b = intercept of the regression line; RSE = residual standard error; R<sup>2</sup> = coefficient of determination; Adj. R<sup>2</sup> = corrected coefficient of determination; Pseudo R<sup>2</sup> = pseudo coefficient of determination; bold = regression models with Pseudo R<sup>2</sup> > 0.5
